# Supplementary material for: Immunoprofiling of Rice Root Cortex Reveals Two Cortical Subdomains
Source: PubMed Central journal article supplement (PMC4703777; doi:10.3389/fpls.2015.01139), 2016-01-07
Supplement: Image1.pdf [file Image1.pdf]

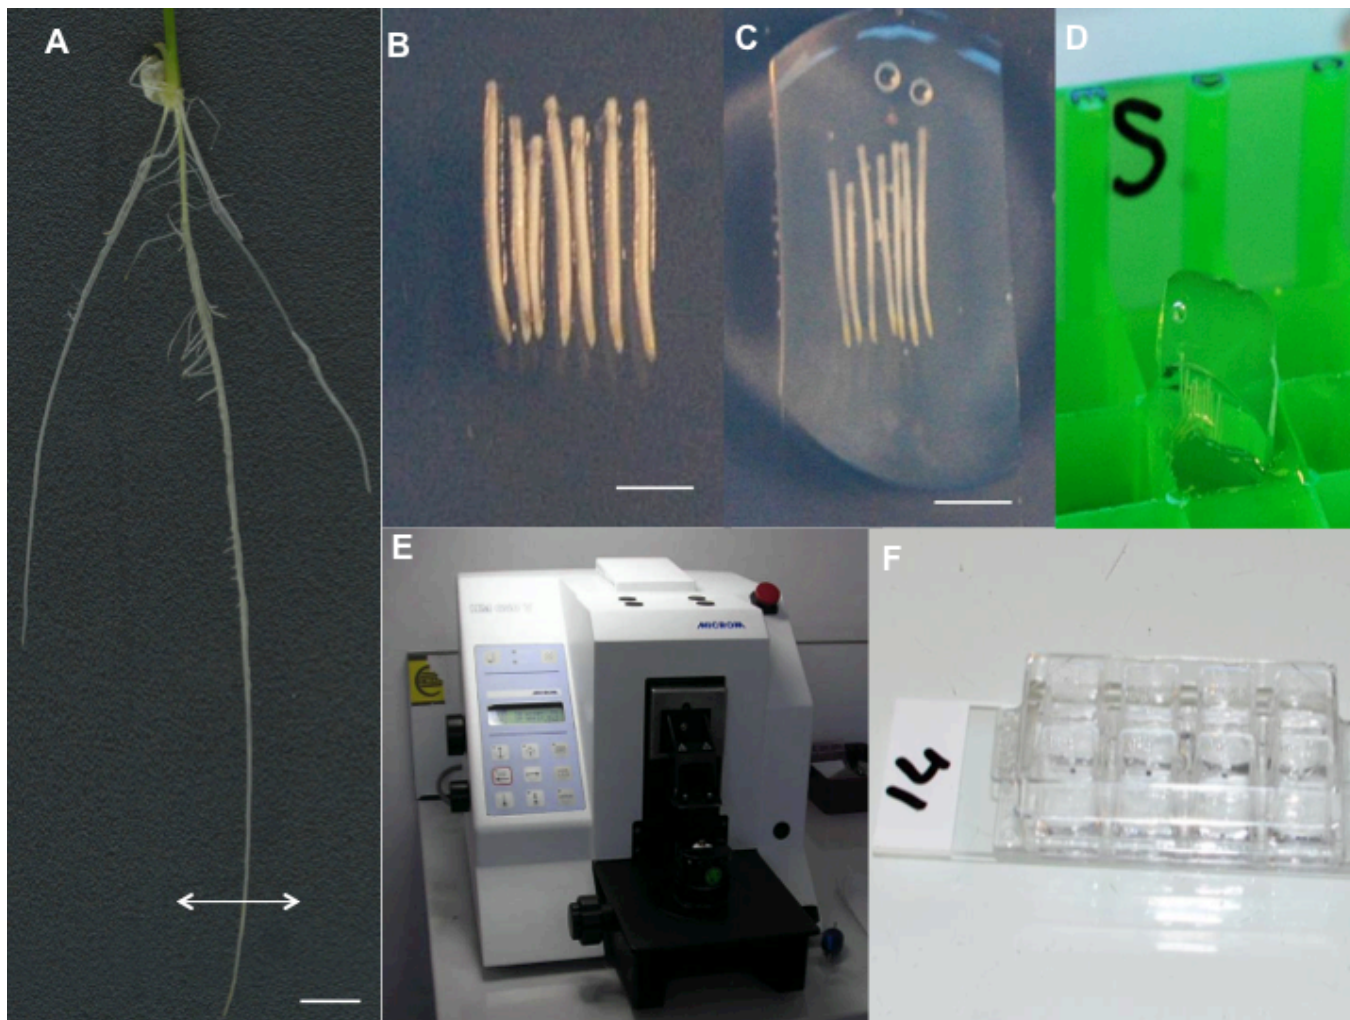

**Suppl-Figure1. Medium throughput protocol to produce radial sections of rice radicle meristems.** **A.** Six-day-old rice seedlings grown on MS/2 medium. Radicle root tips (2 cm long) were collected using a sharp blade (arrow). **B.** Samples were placed parallel to one another to align the root tips. **C.** The root tips were embedded in one drop of 3% melted agarose (50°C). Bar= 0.5 cm. **D.** A patch containing root tips was inserted in a 3x1x1-cm well filled with 3% melted agarose. **E.** After solidification, the blocks were resized and glued on a vibratome plate to be sliced. **F.** The roots were sectioned (60  $\mu$ m thick) radially  $\approx$ 1 cm above the root tip, and the sections were placed on chamber slides for immunostaining (three sections per chamber). Bar= 0.5 cm.
